# Supplementary material for: Inequities in COVID-19 vaccine and booster coverage across Massachusetts ZIP codes after the emergence of Omicron: A population-based cross-sectional study
Source: PubMed Central journal article supplement (PMC9888673; doi:10.1371/journal.pmed.1004167), 2023-01-31
Supplement: pmed.1004167.s001.pdf [file pmed.1004167.s001.pdf]

## STROBE Statement for: “Inequities in COVID-19 vaccine and booster coverage across Massachusetts ZIP codes in Fall 2022: a population-based cross-sectional study”

Checklist of items that should be included in reports of *cross-sectional* observational studies

| Section/Topic             | Item No | Recommendation                                                                                                                                                                       | Reported in [Section, Paragraph Number] |
|---------------------------|---------|--------------------------------------------------------------------------------------------------------------------------------------------------------------------------------------|-----------------------------------------|
| <b>Title and abstract</b> | 1       | (a) Indicate the study’s design with a commonly used term in the title or the abstract                                                                                               | Title                                   |
|                           |         | (b) Provide in the abstract an informative and balanced summary of what was done and what was found                                                                                  | Abstract                                |
| <b>Introduction</b>       |         |                                                                                                                                                                                      |                                         |
| Background/rationale      | 2       | Explain the scientific background and rationale for the investigation being reported                                                                                                 | Background, paragraphs 1-4              |
| Objectives                | 3       | State specific objectives, including any prespecified hypotheses                                                                                                                     | Background, paragraph 5                 |
| <b>Methods</b>            |         |                                                                                                                                                                                      |                                         |
| Study design              | 4       | Present key elements of study design early in the paper                                                                                                                              | Background, paragraph 5                 |
| Setting                   | 5       | Describe the setting, locations, and relevant dates, including periods of recruitment, exposure, follow-up, and data collection                                                      | Methods, paragraphs 1-3                 |
| Participants              | 6       | <i>Cross-sectional study</i> —Give the eligibility criteria, and the sources and methods of selection of participants                                                                | Methods, paragraphs 3-5, 9              |
| Variables                 | 7       | Clearly define all outcomes, exposures, predictors, potential confounders, and effect modifiers. Give diagnostic criteria, if applicable                                             | Methods, paragraphs 1-8                 |
| Data sources/measurement  | 8*      | For each variable of interest, give sources of data and details of methods of assessment (measurement). Describe comparability of assessment methods if there is more than one group | Methods, paragraphs 1-9                 |
| Bias                      | 9       | Describe any efforts to address potential sources of bias                                                                                                                            | Methods, paragraphs 11-15               |
| Study size                | 10      | Explain how the study size was arrived at                                                                                                                                            | Methods, paragraph 1                    |
| Quantitative variables    | 11      | Explain how quantitative variables were handled in the analyses. If applicable, describe which groupings were chosen and why                                                         | Methods, paragraphs 1-10                |
| Statistical methods       | 12      | (a) Describe all statistical methods, including those used to control for confounding                                                                                                | Methods, paragraph 13                   |
|                           |         | (b) Describe any methods used to examine subgroups and interactions                                                                                                                  | Methods, paragraph 14                   |
|                           |         | (c) Explain how missing data were addressed                                                                                                                                          | Methods, paragraph 5, 15                |
|                           |         | (d) <i>Cross-sectional study</i> —If applicable, describe analytical methods taking account of sampling strategy                                                                     | N/A                                     |
|                           |         | (e) Describe any sensitivity analyses                                                                                                                                                | N/A                                     |

| Section/Topic            | Item No | Recommendation                                                                                                                                                                                               | Reported on Page No                              |
|--------------------------|---------|--------------------------------------------------------------------------------------------------------------------------------------------------------------------------------------------------------------|--------------------------------------------------|
| <b>Results</b>           |         |                                                                                                                                                                                                              |                                                  |
| Participants             | 13*     | (a) Report numbers of individuals at each stage of study—eg numbers potentially eligible, examined for eligibility, confirmed eligible, included in the study, completing follow-up, and analysed            | Results, paragraph 1                             |
|                          |         | (b) Give reasons for non-participation at each stage                                                                                                                                                         | N/A                                              |
|                          |         | (c) Consider use of a flow diagram                                                                                                                                                                           | Not reported                                     |
| Descriptive data         | 14*     | (a) Give characteristics of study participants (eg demographic, clinical, social) and information on exposures and potential confounders                                                                     | Results, paragraph 1, Table 1                    |
|                          |         | (b) Indicate number of participants with missing data for each variable of interest                                                                                                                          | N/A                                              |
|                          |         | (c) <i>Cohort study</i> —Summarise follow-up time (eg, average and total amount)                                                                                                                             | N/A                                              |
| Outcome data             | 15*     | <i>Cross-sectional study</i> —Report numbers of outcome events or summary measures                                                                                                                           | Results, paragraph 2-3, Table 1, Fig 1, Fig 2    |
| Main results             | 16      | (a) Give unadjusted estimates and, if applicable, confounder-adjusted estimates and their precision (eg, 95% confidence interval). Make clear which confounders were adjusted for and why they were included | Results, paragraph 4-12, Table 2, Table 3, Fig 3 |
|                          |         | (b) Report category boundaries when continuous variables were categorized                                                                                                                                    | Results, throughout                              |
|                          |         | (c) If relevant, consider translating estimates of relative risk into absolute risk for a meaningful time period                                                                                             | All results presented as absolute risks          |
| Other analyses           | 17      | Report other analyses done—eg analyses of subgroups and interactions, and sensitivity analyses                                                                                                               | Results, paragraph 11-12                         |
| <b>Discussion</b>        |         |                                                                                                                                                                                                              |                                                  |
| Key results              | 18      | Summarise key results with reference to study objectives                                                                                                                                                     | Discussion, paragraph 1                          |
| Limitations              | 19      | Discuss limitations of the study, taking into account sources of potential bias or imprecision. Discuss both direction and magnitude of any potential bias                                                   | Discussion, paragraph 9                          |
| Interpretation           | 20      | Give a cautious overall interpretation of results considering objectives, limitations, multiplicity of analyses, results from similar studies, and other relevant evidence                                   | Discussion, paragraph 2-8                        |
| Generalisability         | 21      | Discuss the generalisability (external validity) of the study results                                                                                                                                        | Discussion, paragraph 9                          |
| <b>Other Information</b> |         |                                                                                                                                                                                                              |                                                  |
| Funding                  | 22      | Give the source of funding and the role of the funders for the present study and, if applicable, for the original study on which the present article is based                                                | N/A                                              |
