# Supplementary material for: Inequities in COVID-19 vaccine and booster coverage across Massachusetts ZIP codes after the emergence of Omicron: A population-based cross-sectional study
Source: PubMed Central journal article supplement (PMC9888673; doi:10.1371/journal.pmed.1004167), 2023-01-31

S1 Fig. Percent Vaccinated and Boosted in Massachusetts Urban Areas as of October 10, 2022

a) Percent Vaccinated

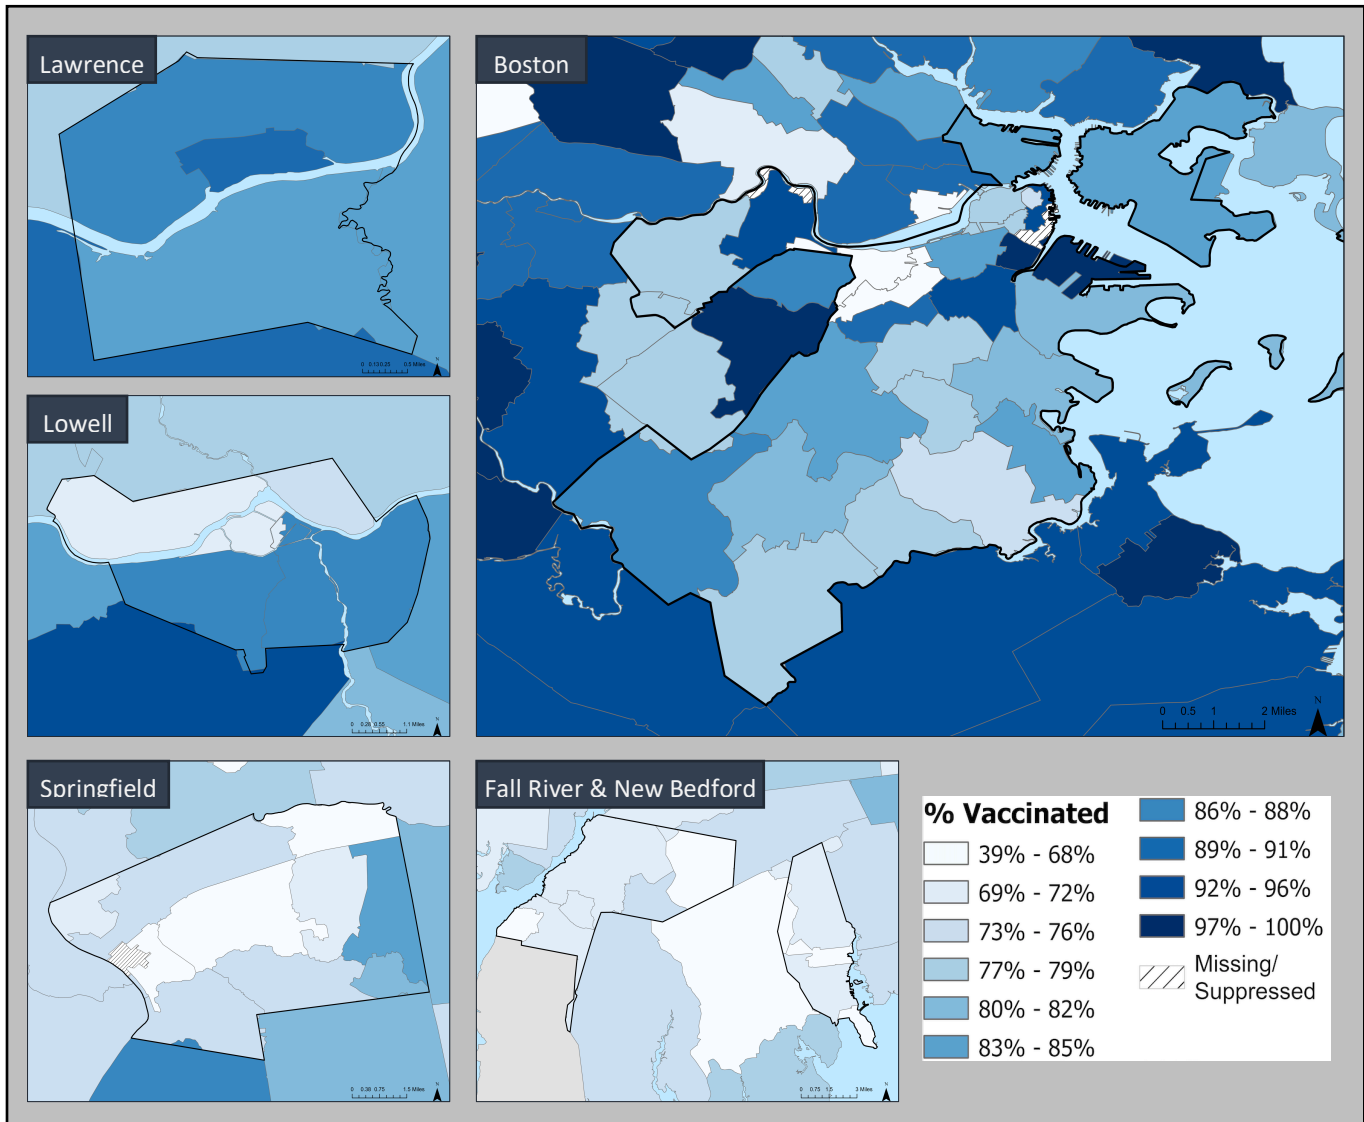

## b) Percent Boosted

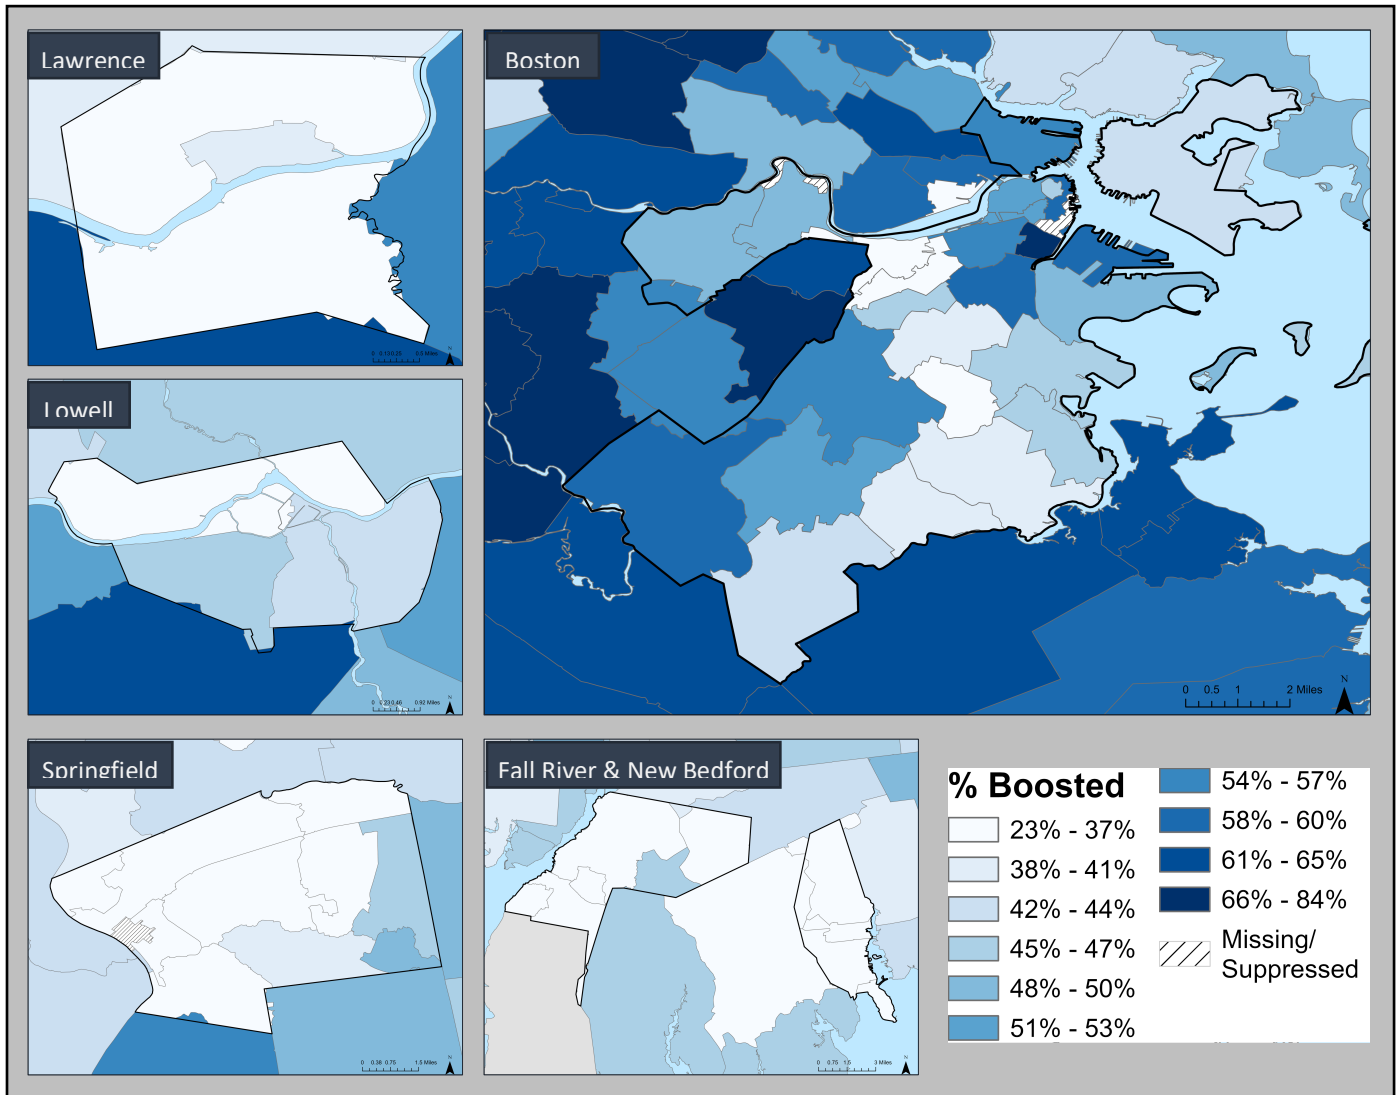

Supplement: pmed.1004167.s002.pdf [file pmed.1004167.s002.pdf]
