# Supplementary material for: Inequities in COVID-19 vaccine and booster coverage across Massachusetts ZIP codes after the emergence of Omicron: A population-based cross-sectional study
Source: PubMed Central journal article supplement (PMC9888673; doi:10.1371/journal.pmed.1004167), 2023-01-31
Supplement: pmed.1004167.s003.pdf [file pmed.1004167.s003.pdf]

**S1 Table. Age-adjusted bivariate associations of ZIP code characteristics with percent vaccinated and boosted**

| <b>a) Vaccinated</b>                                 | <b>Bivariate</b>         |                | <b>Age-adjusted</b>       |                |
|------------------------------------------------------|--------------------------|----------------|---------------------------|----------------|
| <i>Parameters</i>                                    | <i>beta<br/>(95% CI)</i> | <i>p-value</i> | <i>beta<br/>(95% CI)</i>  | <i>p-value</i> |
| Median household income<br>(\$10k increase)          | 4.5***<br>(3.8,5.2)      | <0.001         | 4.6***<br>(3.9,5.4)       | <0.001         |
| % college graduates<br>(10 % point increase)         | 2.9***<br>(2.2,3.6)      | <0.001         | 3.6***<br>(3.0,4.1)       | <0.001         |
| % Black, Latino, Indigenous<br>(10 % point increase) | -0.8**<br>(-1.3,-0.3)    | 0.002          | -0.9**<br>(-1.5,-0.3)     | 0.002          |
| % essential worker<br>(10 % point increase)          | -5.5***<br>(-7.3,-3.8)   | <0.001         | -7.0***<br>(-8.5,-5.5)    | <0.001         |
| VEI community<br>(0,1)                               | -4.0**<br>(-6.4,-1.6)    | 0.001          | -3.9**<br>(-6.8,-1.0)     | 0.008          |
| <b>b) Boosted</b>                                    | <b>Bivariate</b>         |                | <b>Age-adjusted</b>       |                |
| Median household income<br>(\$10k increase)          | 6.8***<br>(6.2,7.4)      | <0.001         | 6.9***<br>(6.2,7.5)       | <0.001         |
| % college graduates<br>(10 % point increase)         | 5.1***<br>(4.5,5.6)      | <0.001         | 5.4***<br>(5.0,5.7)       | <0.001         |
| % Black, Latino, Indigenous<br>(10 % point increase) | -2.6***<br>(-3.0,-2.2)   | <0.001         | -2.6***<br>(-3.2,-2.0)    | <0.001         |
| % essential worker<br>(10 % point increase)          | -11.0***<br>(-12.4,-9.6) | <0.001         | -12.1***<br>(-13.2,-10.9) | <0.001         |
| VEI community<br>(0,1)                               | -11.1***<br>(-13.4,-8.8) | <0.001         | -9.9***<br>(-12.9,-7.0)   | <0.001         |

**Note:** Each cell shows results of a separate OLS (ordinary least squares) regression model. The crude models are bivariate. The age-adjusted include controls for ZIP code age shares in the following groups: 5-19, 20-39, 40-64, and 65+ years. Heteroskedasticity-robust 95% confidence intervals are shown in parentheses.

\*p<0.05, \*\*p<0.01, \*\*\*p<0.001.
