# Supplementary material for: Inequities in COVID-19 vaccine and booster coverage across Massachusetts ZIP codes after the emergence of Omicron: A population-based cross-sectional study
Source: PubMed Central journal article supplement (PMC9888673; doi:10.1371/journal.pmed.1004167), 2023-01-31
Supplement: pmed.1004167.s004.pdf [file pmed.1004167.s004.pdf]

**S2 Table. Sex-stratified models: associations of ZIP code characteristics with percentage vaccinated and boosted**

| <i>Dependent variable</i>         | <b>Vaccinated</b>           |                             | <b>Boosted</b>              |                             |
|-----------------------------------|-----------------------------|-----------------------------|-----------------------------|-----------------------------|
|                                   | <i>Sex</i><br>(F)           | (M)                         | (F)                         | (M)                         |
| Median household income           | 4.57*** <0.001<br>(3.3,5.8) | 2.97*** 0.001<br>(1.3,4.6)  | 3.48*** <0.001<br>(2.3,4.7) | 2.24*** <0.001<br>(0.9,3.6) |
| Percent college graduates         | 1.84*** <0.001<br>(0.9,2.8) | 3.76*** <0.001<br>(2.4,5.1) | 2.70*** <0.001<br>(1.7,3.7) | 3.56*** <0.001<br>(2.6,4.6) |
| Percent Black, Latino, Indigenous | 1.24** 0.001<br>(0.5,2.0)   | 1.50*** <0.001<br>(0.7,2.2) | 0.37 0.133<br>(-0.1,0.8)    | 0.38 0.086<br>(-0.1,0.8)    |
| Percent essential worker          | 4.70*** <0.001<br>(2.6,6.8) | 4.69*** <0.001<br>(2.2,7.2) | 1.57 0.080<br>(-0.2,3.3)    | -0.20 0.815<br>(-1.9,1.5)   |
| VEI community (0,1)               | -1.7 0.298<br>(-4.9,1.5)    | -2.1 0.285<br>(-5.9,1.7)    | -3.9** 0.004<br>(-6.6,-1.2) | -3.4* 0.012<br>(-6.1,-0.7)  |
| R <sup>2</sup>                    | 0.35                        | 0.39                        | 0.65                        | 0.71                        |
| N                                 | 418                         | 418                         | 418                         | 418                         |

**Note:** Each column shows results of a separate OLS (ordinary least squares) regression model. The models are stratified by sex. Each includes controls for ZIP code age shares in the following groups: 5-19, 20-39, 40-64, and 65+ years. Heteroskedasticity-robust 95% confidence intervals are shown in parentheses. \*p<0.05, \*\*p<0.01, \*\*\*p<0.001.
